# Supplementary material for: Increased Uterine NK cell numbers and perforin expression during the implantation phase in IVF Cycles with GnRH Antagonist Protocol
Source: PubMed Central journal article supplement (PMC5206673; doi:10.1038/srep39912), 2017-01-03

## **Supplementary Information**

### **Increased Uterine NK cell numbers and perforin expression during the implantation phase in IVF Cycles with GnRH Antagonist Protocol**

Bufang Xu, Ph.D.<sup>1</sup>, Jingwen Wang, M.S.<sup>1</sup>, Lan Xia, M.S.<sup>1</sup>, Dan Zhang, Ph.D.<sup>1</sup>, Xian Wu, M.S.<sup>1</sup>, Aijun Zhang, Ph.D.<sup>1,2</sup>

1. Reproductive Medical Center of Ruijin Hospital, School of Medicine, Shanghai Jiao Tong University
2. Shanghai Key Laboratory of Reproductive Medicine

Correspondence: Dr Aijun Zhang (E-mail: [zhaj1268@163.com](mailto:zhaj1268@163.com))

Bufang Xu and Jingwen Wang contributed equally to this work.

## Supplementary Fig. S1:

The full length SDS-PAGE gels and blots of total protein extracts from endometrial tissue with mAb FasL ( A ), Perforin ( B ), CD56 ( C ), GnRHR ( D ).

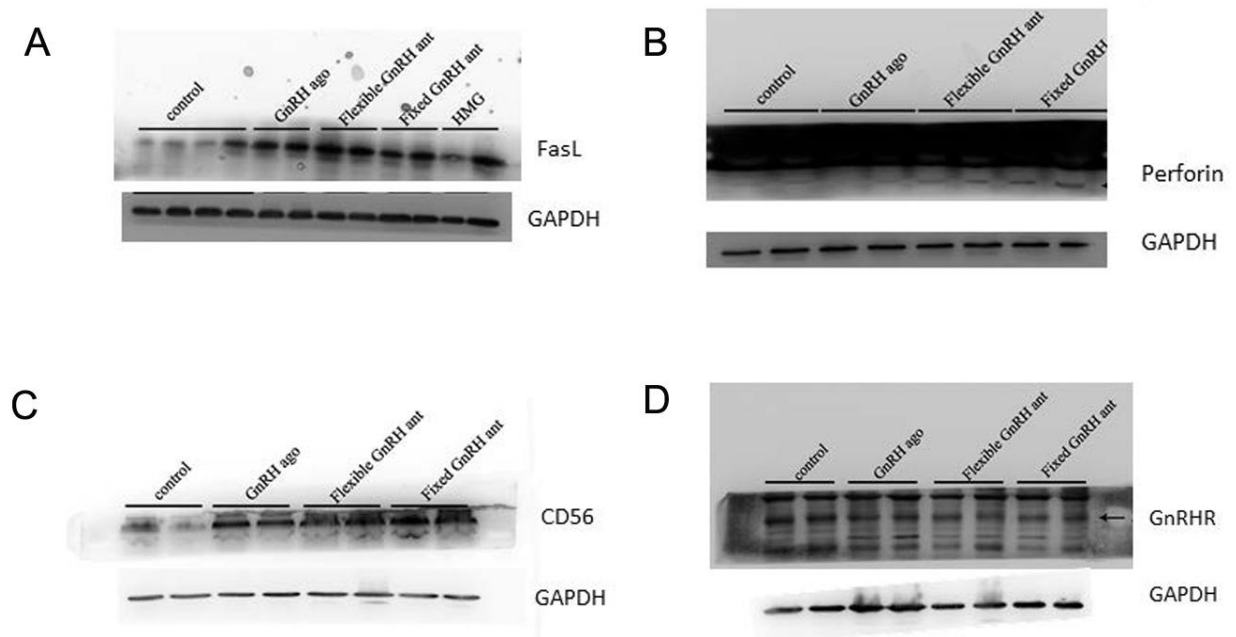

Supplement: srep39912-s1.pdf [file srep39912-s1.pdf]
